# Supplementary material
Source: publisher figshare collection journal article supplement (https://sage.figshare.com/ndownloader/files/20179112)
Supplement: Supplementary file 1 [file 20179112]

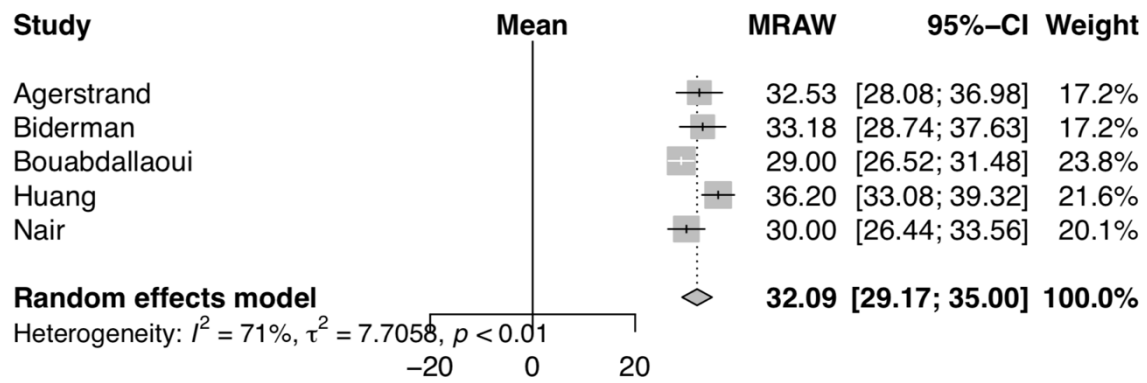

**Supplementary Figure S1. Pooled mean age across 5 of the 9 included studies.**

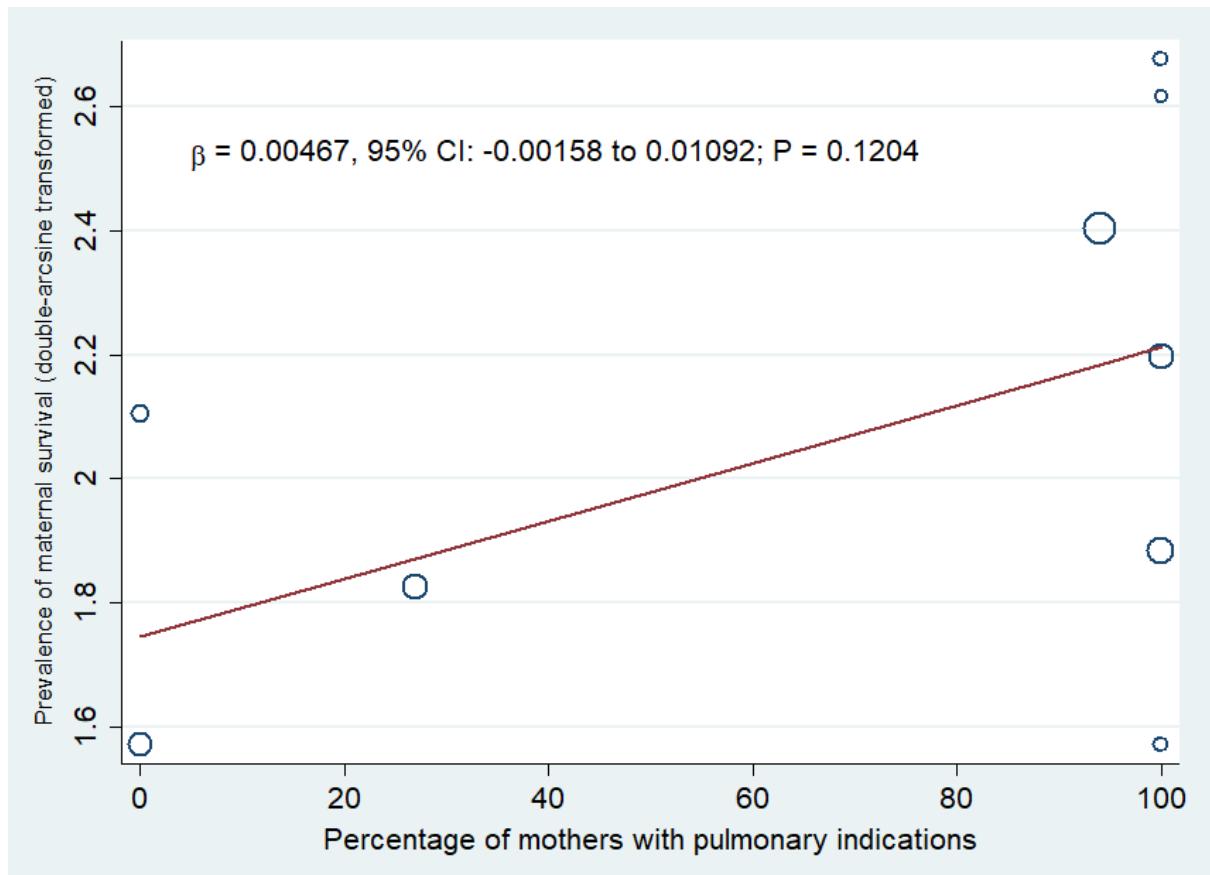

**Supplementary Figure S2. Meta-regression of maternal survival against percentage of mothers with pulmonary indications for ECMO in each study.**

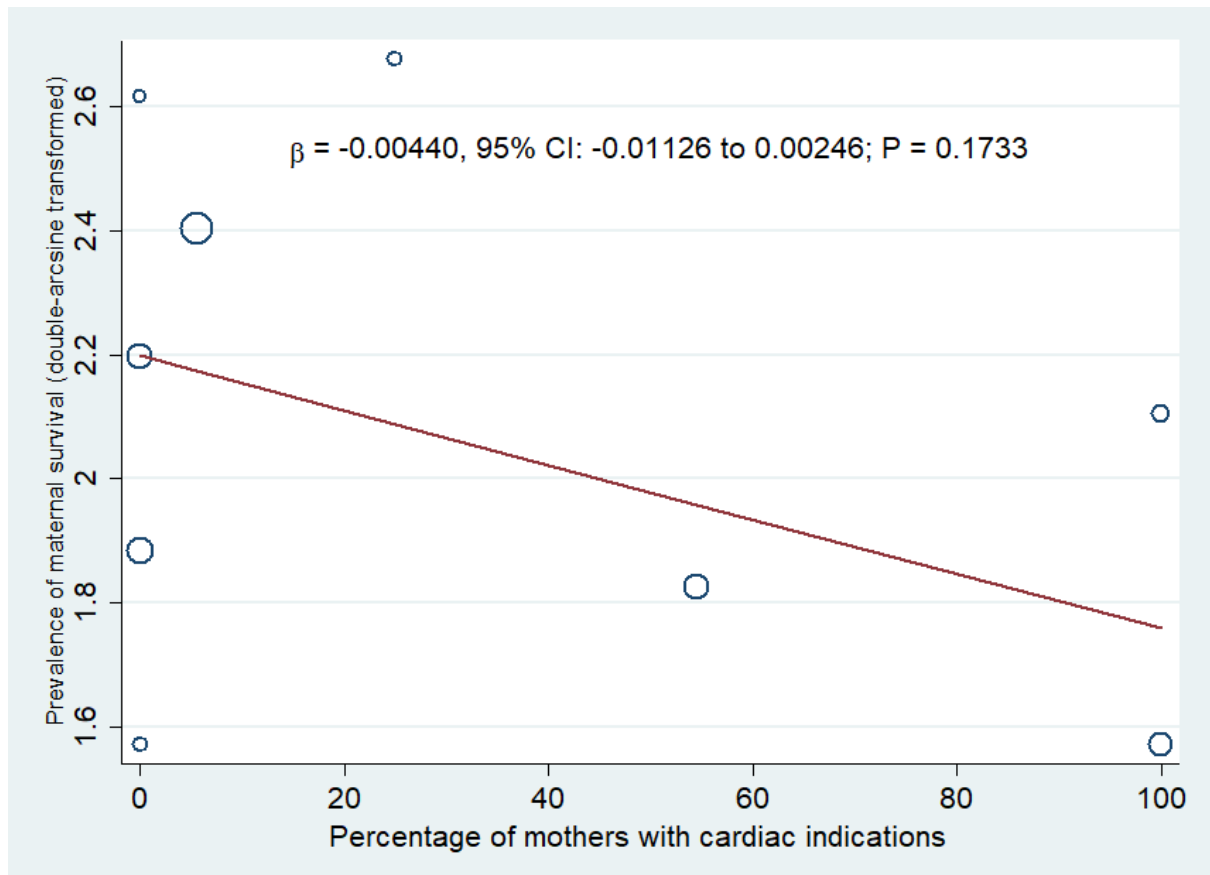

**Supplementary Figure S3. Meta-regression of maternal survival against percentage of mothers with cardiac indications for ECMO in each study.**

**Supplementary Table S1. Database search phrases**

| Database | Exact search phrase                                                                                                                                                                                                                                                                                                                                                                                                                                                                                                                                                      |
|----------|--------------------------------------------------------------------------------------------------------------------------------------------------------------------------------------------------------------------------------------------------------------------------------------------------------------------------------------------------------------------------------------------------------------------------------------------------------------------------------------------------------------------------------------------------------------------------|
| MEDLINE  | ((("Extracorporeal Membrane Oxygenation"[Mesh]) OR ((ECMO[Title/Abstract] OR "Extracorporeal Membrane Oxygenation"[Title/Abstract] OR extracorporeal life support[Title/Abstract] OR extracorporeal membrane oxygenator support[Title/Abstract]))) AND (("Pregnancy"[Mesh]) OR ((pregnan*[Title/Abstract] OR postpartum[Title/Abstract] OR peripartum[Title/Abstract] OR prenatal[Title/Abstract] OR postnatal[Title/Abstract] OR gestation[Title/Abstract] OR gestational[Title/Abstract]))))                                                                           |
| Embase   | ((('pregnancy'/exp OR 'puerperium'/exp OR 'perinatal period'/exp OR 'prenatal period'/exp OR 'gestation period'/exp) OR ('pregnancy':ab,ti OR 'puerperium':ab,ti OR 'perinatal period':ab,ti OR 'prenatal period':ab,ti OR 'gestation period':ab,ti)) AND (('extracorporeal membrane oxygenation device'/exp OR 'extracorporeal oxygenation'/exp OR 'extracorporeal life support'/exp OR 'extracorporeal life support system'/exp) OR ('extracorporeal membrane oxygenation device':ab,ti OR 'extracorporeal oxygenation':ab,ti OR 'extracorporeal life support':ab,ti)) |
| Scopus   | ( TITLE-ABS-KEY ( pregnancy OR pregnant OR postpartum OR peripartum OR postpartum OR peri-partum OR gestation OR gestational OR prenatal OR postnatal ) ) AND ( TITLE-ABS-KEY ( 'extracorporeal AND oxygenation' OR 'extra-corporeal AND oxygenation' OR 'extracorporeal AND life AND support' OR 'extra-corporeal AND life AND support' OR 'extracorporeal AND membrane AND oxygenation' OR 'extra-corporeal AND membrane AND oxygenation' OR ecmo ) )                                                                                                                  |

**Supplementary Table S2. JBI checklist for prevalence studies**

| Study               | Question no. |   |   |   |   |   |   |   |   | Overall |
|---------------------|--------------|---|---|---|---|---|---|---|---|---------|
|                     | 1            | 2 | 3 | 4 | 5 | 6 | 7 | 8 | 9 |         |
| Dubar et al         | ✓            | ✓ | ✓ |   | ✓ | ✓ | ✓ | ✓ | ✓ | ✓       |
| Holzgraefe et al    | ✓            | ✓ | ✓ |   | ✓ | ✓ | ✓ | ✓ | ✓ | ✓       |
| Nair et al          | ✓            | ✓ | ✓ | ✓ | ✓ | ✓ | ✓ | ✓ | ✓ | ✓       |
| Agerstrand et al    | ✓            | ✓ | ✓ | ✓ | ✓ | ✓ | ✓ | ✓ | ✓ | ✓       |
| Biderman et al      | ✓            | ✓ | ✓ | ✓ | ✓ | ✓ | ✓ | ✓ | ✓ | ✓       |
| Sharma et al        | ✓            | ✓ | ✓ | ✓ | ✓ | ✓ | ✓ | ✓ | ✓ | ✓       |
| Bouabdallaoui et al | ✓            | ✓ | ✓ | ✓ | ✓ | ✓ | ✓ | ✓ | ✓ | ✓       |
| Hou et al           | ✓            | ✓ | ✓ |   | ✓ | ✓ | ✓ | ✓ | ✓ | ✓       |
| Huang et al         | ✓            | ✓ | ✓ | ✓ | ✓ | ✓ | ✓ | ✓ | ✓ | ✓       |

**Domains:**

1. Was the sample frame appropriate to address the target population?
2. Were study participants sampled in an appropriate way?
3. Was the sample size adequate?
4. Were the study subjects and the setting described in detail?
5. Was the data analysis conducted with sufficient coverage of the identified sample?
6. Were valid methods used for the identification of the condition?
7. Was the condition measured in a standard, reliable way for all participants?
8. Was there appropriate statistical analysis?
9. Was the response rate adequate, and if not, was the low response rate managed appropriately?

**Supplementary Table S3. JBI checklist for case series**

| Study               | Question no. |   |   |   |   |   |   |   |   |    | Overall |
|---------------------|--------------|---|---|---|---|---|---|---|---|----|---------|
|                     | 1            | 2 | 3 | 4 | 5 | 6 | 7 | 8 | 9 | 10 |         |
| Dubar et al         | ✓            | ✓ | ✓ | ✓ | ✓ | ✓ | ✓ | ✓ | ✓ | ✓  | ✓       |
| Holzgraefe et al    | ✓            | ✓ | ✓ | ✓ | ✓ | ✓ | ✓ | ✓ | ✓ | ✓  | ✓       |
| Nair et al          | ✓            | ✓ | ✓ | ✓ | ✓ | ✓ | ✓ | ✓ | ✓ | ✓  | ✓       |
| Agerstrand et al    | ✓            | ✓ | ✓ | ✓ | ✓ | ✓ | ✓ | ✓ | ✓ | ✓  | ✓       |
| Biderman et al      | ✓            | ✓ | ✓ | ✓ | ✓ | ✓ | ✓ | ✓ | ✓ | ✓  | ✓       |
| Sharma et al        | ✓            | ✓ | ✓ | ✓ | ✓ | ✓ | ✓ | ✓ | ✓ | ✓  | ✓       |
| Bouabdallaoui et al | ✓            | ✓ | ✓ | ✓ | ✓ | ✓ | ✓ | ✓ | ✓ | ✓  | ✓       |
| Hou et al           | ✓            | ✓ | ✓ | ✓ | ✓ | ✓ | ✓ | ✓ | ✓ | ✓  | ✓       |
| Huang et al         | ✓            | ✓ | ✓ | ✓ | ✓ | ✓ | ✓ | ✓ | ✓ | ✓  | ✓       |

**Domains:**

1. Was there clear criteria for inclusion in the case series?
2. Was the condition measured in a standard, reliable way for all participants included in the case series?
3. Were valid methods used for identification of the condition for all participants included in the case series?
4. Did the case series have consecutive inclusion of participants?
5. Did the case series have complete inclusion of participants?
6. Was there clear reporting of the demographics of the participants in the study?
7. Was there clear reporting of clinical information of the participants?
8. Were the outcomes or follow up results of cases clearly reported?
9. Was there clear reporting of the presenting site(s)/clinic(s) demographic information?
10. Was statistical analysis appropriate?
